# Supplementary material
Source: ML conference proceedings conference paper supplement (https://openaccess.thecvf.com/content/CVPR2023/html/Do_Quantitative_Manipulation_of_CVPR_2023_paper.html)
Supplement: Supplementary file 2 [file Do_Quantitative_Manipulation_of_CVPR_2023_supplemental.zip]

Archive with 5 entries (5 files):
- video/1_age.mp4
- video/2_smile.mp4
- video/3_pain.mp4
- video/4_cat_eye.mp4
- ____CVPR_2023__Quantitative_Manipulation_of_Custom_Attributes_on_3D_aware_Image_Synthes_suppl.pdf
